# Supplementary material for: RbSbSO4Cl2: an excellent sulfate nonlinear optical material generated due to the synergistic effect of three asymmetric chromophores
Source: Royal Society of Chemistry journal article supplement (doi:10.1039/c9tc01249d), 2019-01-01
Supplement: c9tc01249d1.pdf [file c9tc01249d1.pdf]

## Supporting Information

### **RbSbSO<sub>4</sub>Cl<sub>2</sub>: an excellent sulfate nonlinear optical material generated due to the synergistic effect of three asymmetric chromophores**

Fangfang He,<sup>a</sup> Yalan Deng,<sup>a</sup> Xiaoyu Zhao,<sup>b</sup> Ling Huang,<sup>\*a</sup> Daojiang Gao,<sup>a</sup> Jian Bi,<sup>a</sup> Xin Wang,<sup>b</sup> and Guohong Zou<sup>\*b</sup>

<sup>a</sup>College of Chemistry and Materials Science, Sichuan Normal University, Chengdu, 610068, P. R. China.

<sup>b</sup>College of Chemistry, Sichuan University, Chengdu, 610064, P. R. China.

E-mail: huangl026@sina.com; zough@scu.edu.cn

## CONTENTS

**Table S1.** Atomic coordinates and equivalent isotropic displacement parameters for  $\text{RbSbSO}_4\text{Cl}_2$ .

**Table S2.** Selected Bond lengths [ $\text{\AA}$ ] and angles [ $^\circ$ ] for  $\text{RbSbSO}_4\text{Cl}_2$ .

**Table S3.** Calculation of dipole moments for  $\text{SO}_4$ ,  $\text{SbO}_3\text{Cl}_2$ ,  $\text{RbO}_5\text{Cl}_4$  polyhedra in  $\text{RbSbSO}_4\text{Cl}_2$ .

**Figure S1.** Crystal photograph of  $\text{RbSbSO}_4\text{Cl}_2$ .

**Figure S2.** IR spectrum for  $\text{RbSbSO}_4\text{Cl}_2$ .

**Figure S3.** TGA curve for  $\text{RbSbSO}_4\text{Cl}_2$ .

**Figure S4.** Powder X-ray diffraction (PXRD) patterns for pure phase  $\text{RbSbSO}_4\text{Cl}_2$  (a); the residue for TGA (b); PDF for  $\text{Rb}_2\text{SO}_4$  (c).

**Figure S5.** Electron-density difference map for  $\text{RbSbSO}_4\text{Cl}_2$ .

**Table S1.** Atomic coordinates and equivalent isotropic displacement parameters for RbSbSO<sub>4</sub>Cl<sub>2</sub>. $U_{\text{eq}}$  is defined as one third of the trace of the orthogonalized  $U_{ij}$  tensor.

| atom | $x$          | $y$          | $z$          | $U_{\text{eq}} (\text{\AA}^2)$ | BVS   |
|------|--------------|--------------|--------------|--------------------------------|-------|
| Sb1  | 0.97056 (11) | 0.12441 (8)  | 0.38528 (4)  | 0.0082 (2)                     | 2.870 |
| Rb1  | 0.5207 (2)   | 0.70373 (12) | 0.34032 (6)  | 0.0157 (3)                     | 0.943 |
| Cl1  | 0.9061 (4)   | -0.0123 (4)  | 0.24714 (16) | 0.0144 (5)                     | 0.861 |
| Cl2  | 1.0549 (4)   | -0.1606 (3)  | 0.44672 (16) | 0.0166 (5)                     | 0.996 |
| S1   | 0.4948 (4)   | 0.1887 (3)   | 0.38712 (14) | 0.0087 (5)                     | 5.848 |
| O1   | 0.6574 (11)  | 0.0492 (10)  | 0.4167 (5)   | 0.0108 (14)                    | 2.101 |
| O2   | 0.6146 (13)  | 0.3261 (10)  | 0.3410 (5)   | 0.0161 (16)                    | 1.950 |
| O3   | 0.3828 (13)  | 0.2614 (12)  | 0.4610 (5)   | 0.0187 (17)                    | 1.695 |
| O4   | 0.3452 (11)  | 0.0923 (10)  | 0.3317 (4)   | 0.0096 (14)                    | 1.972 |

**Table S2.** Selected Bond lengths [Å] and angles [°] for RbSbSO<sub>4</sub>Cl<sub>2</sub>.

|                         |            |                                         |             |
|-------------------------|------------|-----------------------------------------|-------------|
| Sb1—O1                  | 2.123 (7)  | O1—Sb1—Cl2                              | 83.3 (2)    |
| Sb1—Cl2                 | 2.382 (3)  | O1—Sb1—Cl1                              | 86.7 (2)    |
| Sb1—Cl1                 | 2.438 (3)  | Cl2—Sb1—Cl1                             | 91.96 (9)   |
| Sb1—O4 <sup>i</sup>     | 2.535 (7)  | O1—Sb1—O4 <sup>i</sup>                  | 158.7 (3)   |
| Rb1—O2                  | 2.858 (8)  | O2—S1—O3                                | 113.1 (5)   |
| Rb1—O1 <sup>iii</sup>   | 2.956 (8)  | O2—S1—O4                                | 112.1 (5)   |
| Rb1—O4 <sup>iv</sup>    | 2.962 (7)  | O3—S1—O4                                | 109.7 (5)   |
| Rb1—O4 <sup>iii</sup>   | 3.087 (7)  | O2—S1—O1                                | 105.6 (4)   |
| Rb1—O2 <sup>iv</sup>    | 3.121 (9)  | O3—S1—O1                                | 109.4 (4)   |
| Rb1—Cl2 <sup>v</sup>    | 3.383 (3)  | O4—S1—O1                                | 106.8 (4)   |
| Rb1—Cl1 <sup>iv</sup>   | 3.435 (3)  | O2—Rb1—O2 <sup>iv</sup>                 | 110.15 (19) |
| Rb1—Cl1 <sup>iii</sup>  | 3.544 (3)  | O4 <sup>iii</sup> —Rb1—O2 <sup>iv</sup> | 65.81 (19)  |
| Rb1—Cl2 <sup>vi</sup>   | 3.545 (3)  | O2—Rb1—Cl2 <sup>v</sup>                 | 83.72 (18)  |
| S1—O2                   | 1.463 (8)  | O2—Rb1—O1 <sup>iii</sup>                | 141.5 (2)   |
| S1—O3                   | 1.468 (8)  | O2—Rb1—O4 <sup>iv</sup>                 | 70.8 (2)    |
| S1—O4                   | 1.475 (7)  | O1 <sup>iii</sup> —Rb1—O4 <sup>iv</sup> | 122.0 (2)   |
| S1—O1                   | 1.532 (8)  | O2—Rb1—O4 <sup>iii</sup>                | 170.6 (2)   |
| Cl2—Sb1—O4 <sup>i</sup> | 80.91 (18) | O4 <sup>iv</sup> —Rb1—O4 <sup>iii</sup> | 108.83 (17) |
| Cl1—Sb1—O4 <sup>i</sup> | 79.65 (17) |                                         |             |

Symmetry codes: (i)  $x+1, y, z$ ; (ii)  $x, y-1, z$ ; (iii)  $x, y+1, z$ ; (iv)  $-x+1, y+1/2, -z+1/2$ ; (v)  $x-1/2, -y+1/2, -z+1$ ; (vi)  $x-1, y+1, z$ ; (vii)  $-x+1, y-1/2, -z+1/2$ ; (viii)  $x+1/2, -y+1/2, -z+1$ ; (ix)  $x+1, y-1, z$ ; (x)  $x-1, y, z$ .

**Table S3.** Calculation of dipole moments for SO<sub>4</sub>, SbO<sub>3</sub>Cl<sub>2</sub>, RbO<sub>5</sub>Cl<sub>4</sub> polyhedra in RbSbSO<sub>4</sub>Cl<sub>2</sub> (D = Debyes).

| RbSbSO <sub>4</sub> Cl <sub>2</sub> |                   |              |              |                 |
|-------------------------------------|-------------------|--------------|--------------|-----------------|
| Polar unit (a unit cell)            | Dipole moment (D) |              |              |                 |
|                                     | x-component       | y-component  | z-component  | total magnitude |
| SO <sub>4</sub>                     | 1.1988974         | 1.774326     | 0.093682422  | 2.143447        |
|                                     | -1.1988974        | 1.774326     | -0.093682422 | 2.143447        |
|                                     | -1.197792277      | -1.77543     | 0.094428808  | 2.143772        |
|                                     | -1.199189995      | -1.77521     | 0.095317119  | 2.144415        |
|                                     | 1.199189995       | -1.77521     | -0.095317119 | 2.144415        |
|                                     | 1.197792277       | -1.77543     | -0.094428808 | 2.143772        |
| SbO <sub>3</sub> Cl <sub>2</sub>    | -3.010043015      | 21.24077434  | -0.953131452 | 21.47415454     |
|                                     | 3.00927112        | 21.24029045  | 0.955321669  | 21.47366505     |
|                                     | 3.009800592       | -21.23967076 | -0.955689796 | 21.47314268     |
|                                     | -3.009555435      | -21.24075129 | 0.952926156  | 21.47405429     |
| RbO <sub>5</sub> Cl <sub>4</sub>    | -5.271055366      | -5.252723139 | -1.594764963 | 7.61041394      |
|                                     | 5.270891526       | -5.252525211 | 1.594653489  | 7.610140493     |
|                                     | 5.271019732       | 5.252674496  | -1.594653431 | 7.610332315     |
|                                     | -5.270891526      | 5.252525211  | 1.594653489  | 7.610140493     |

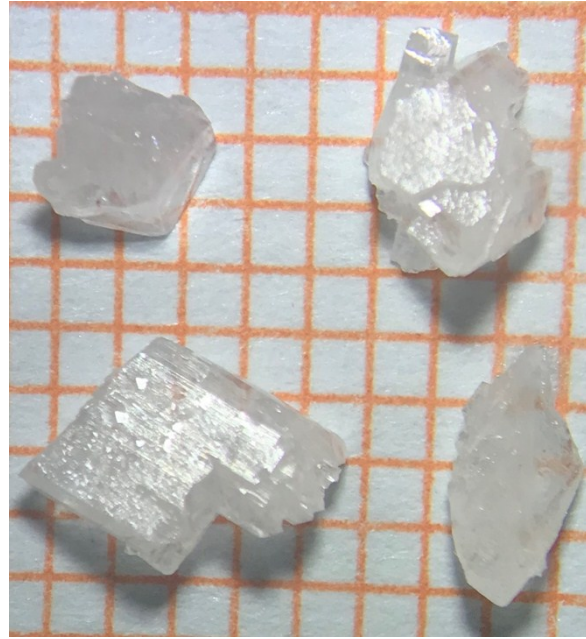

**Figure S1.** The crystal photograph of RbSbSO<sub>4</sub>Cl<sub>2</sub>.

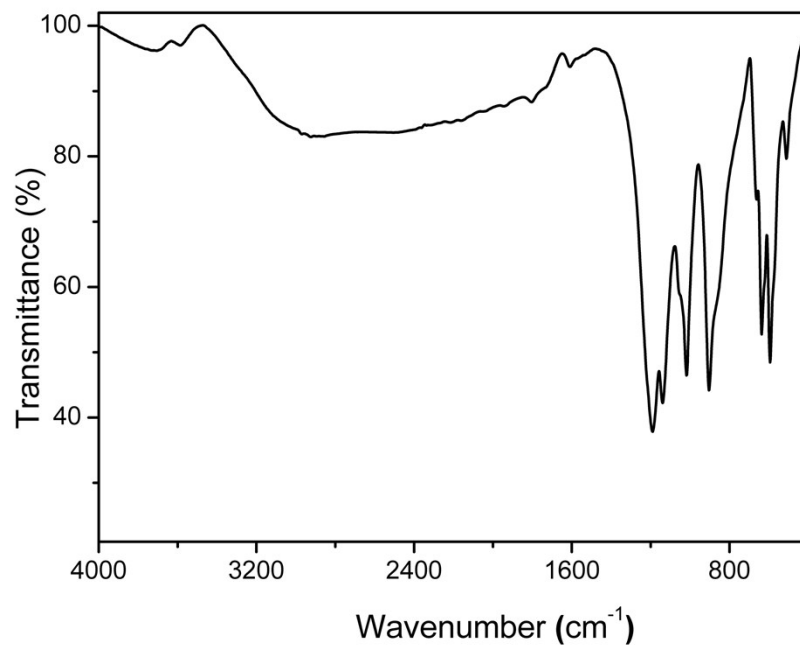

**Figure S2.** IR spectrum for RbSbSO<sub>4</sub>Cl<sub>2</sub>.

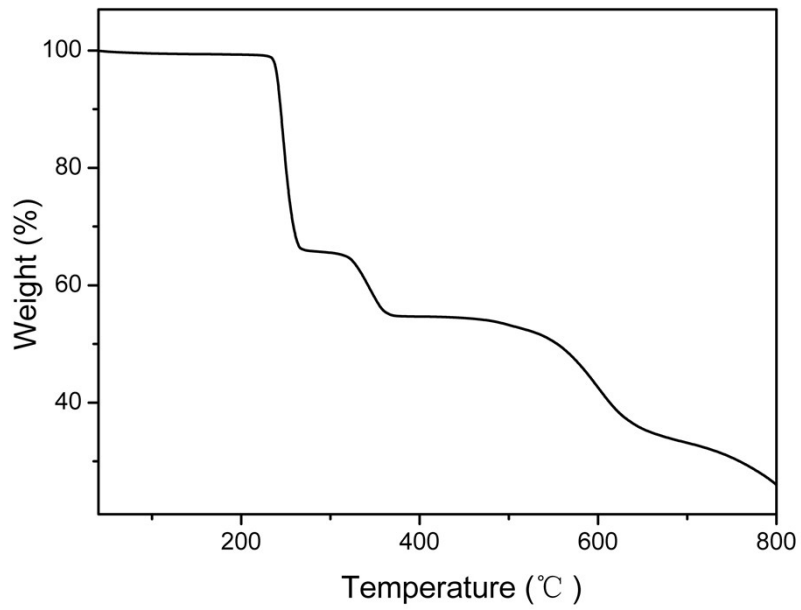

**Figure S3.** TGA curve for RbSbSO<sub>4</sub>Cl<sub>2</sub>.

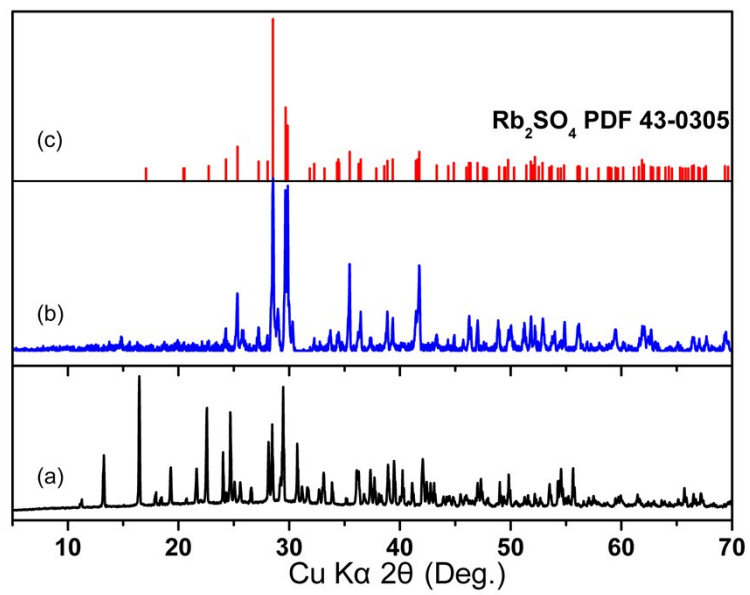

**Figure S4.** Powder X-ray diffraction (PXRD) patterns for pure phase RbSbSO<sub>4</sub>Cl<sub>2</sub> (a); the residue for TGA (b); PDF for Rb<sub>2</sub>SO<sub>4</sub> (c).

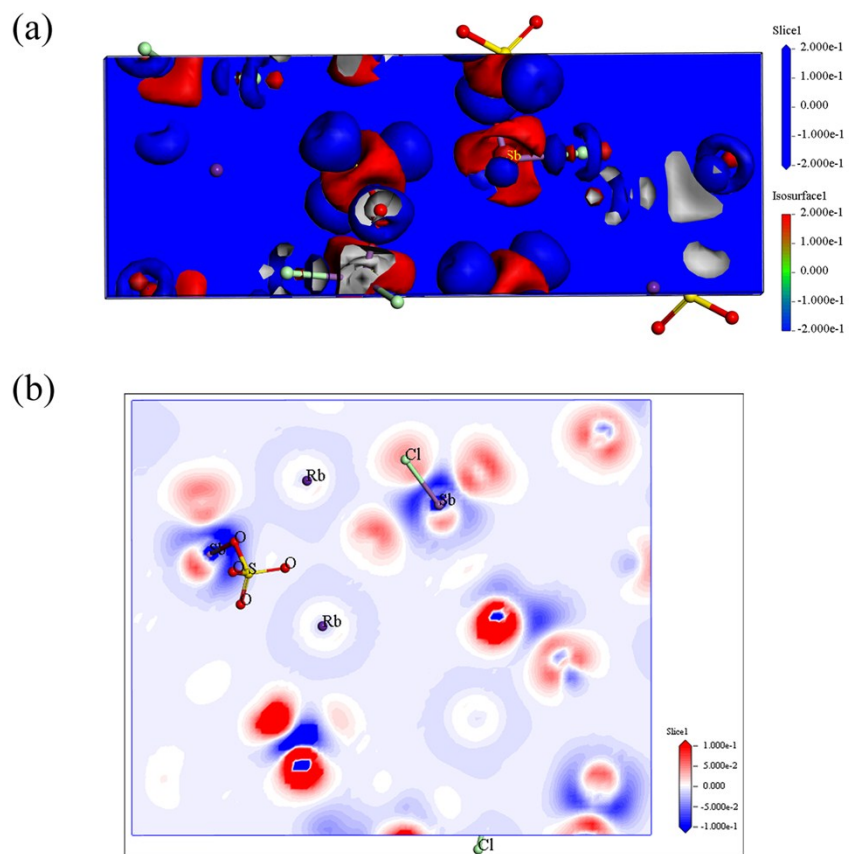

**Figure S5.** Electron-density difference map for  $\text{RbSbSO}_4\text{Cl}_2$ .
